# Supplementary material
Source: PubMed Central journal article supplement (PMC3973431)
Supplement: NIHMS544196-supplement-1_si_002.pdf [file NIHMS544196-supplement-1_si_002.pdf]

Supplement 2:

| Program       | Code Base                                 | Primary Focus              | Statistical Analysis Capabilities | Putative Identification              | Comments                                                                                                                |
|---------------|-------------------------------------------|----------------------------|-----------------------------------|--------------------------------------|-------------------------------------------------------------------------------------------------------------------------|
| MetaboLyzr    | Open source<br>Written in Python/R        | Post-processed analysis    | Extensive                         | KEGG<br>HMDB<br>BioCyc<br>Lipid Maps | Only workflow to eschew missing value imputation for alternative methods                                                |
| XCMS          | Open source<br>Written in R<br>Web server | Chromatogram deconvolution | Limited                           | Metlin                               | Its suggested workflow may bias peak picking                                                                            |
| MetaboAnalyst | Web server                                | Post-processed analysis    | Extensive                         | HMDB<br>DrugBank<br>T3DB<br>SMPDB    | Very thorough workflow, but output can contain too much statistical information that can seem superfluous to biologists |
| FIEmopro      | Open Source<br>Written in R               | Post-processed analysis    | Extensive                         | None                                 | Very thorough workflow, however lacks putative identification capabilities                                              |
| Sieve         | Proprietary<br>(Thermo Scientific)        | Chromatogram deconvolution | Limited                           | ChemSpider                           | Commercial software; proprietary algorithms                                                                             |
| MPP           | Proprietary<br>(Agilent)                  | Chromatogram deconvolution | Limited                           | Metlin                               | Commercial software; proprietary algorithms                                                                             |
| MarkerLynx    | Proprietary<br>(Waters)                   | Chromatogram deconvolution | Limited                           | ChemSpider                           | Commercial software; proprietary algorithms                                                                             |
| MZmine        | Open Source<br>Written in Java            | Chromatogram deconvolution | Limited                           | PubChem<br>KEGG<br>METLIN<br>HMDB    | Excellent graphical user interface and cross platform compatibility                                                     |

**Table S-1.** A table outlining the major software suites utilized in metabolomics. The majority of programs available for analyzing metabolomics data focus on the pre-processing stage. Only a handful of programs are especially designed for post-processed statistical analysis.
